# Supplementary material for: Nonlinear Rashba spin splitting in transition metal dichalcogenide monolayers
Source: Royal Society of Chemistry journal article supplement (doi:10.1039/c6nr04235j), 2016-01-01
Supplement: c6nr04235j1.pdf [file c6nr04235j1.pdf]

Electronic supplementary information (ESI) available

# Nonlinear Rashba Spin Splitting in Transition Metal Dichalcogenide Monolayers

Cai Cheng<sup>a,b</sup>, Jia-Tao Sun<sup>\*,a</sup>, Xiang-Rong Chen<sup>\*,b</sup>, Hui-Xia Fu<sup>a</sup>, Sheng Meng<sup>\*,a,c</sup>

<sup>a</sup>Beijing National Laboratory for Condensed Matter Physics and Institute of Physics, Chinese Academy of Sciences, Beijing 100190, China

<sup>b</sup>College of Physical Science and Technology, Sichuan University, Chengdu 610064, China

<sup>c</sup>School of Physical Sciences, University of Chinese Academy of Sciences, Beijing 100190, China

## 1. Atomic and electronic structures of monolayer TMDs

The atomic structures of the monolayers MXY (M = Mo, W; X, Y = S, Se) is shown in Figure 1a. When  $d_{M-X}$  is equal to  $d_{M-Y}$ , MXY becomes non-polar systems, such as MoS<sub>2</sub>, MoSe<sub>2</sub> and WS<sub>2</sub>. When  $d_{M-X}$  is not equal to  $d_{M-Y}$ , MXY denotes for MoSSe with an out-of-plane dipole moment (Figure S2b). The lattice parameters of MoSSe are  $a_0=3.25$  Å,  $\Delta_d=3.23$  Å,  $d_{M-X}=2.42$  Å,  $d_{M-Y}=2.53$  Å, respectively. The lattice constants are well consistent with the results of Zhu *et. al.*,<sup>1</sup> Cheng *et. al.*<sup>2</sup> and Zhuang *et. al.*<sup>3</sup> More details structural information is presented in Table S1. The phonon dispersion of MXY is plotted in Figure S1 No imaginary frequency indicates that the MXY can be dynamically stable under strong electric field.

**Table S1.** Structural and electronic parameters of MXY. Lattice constant  $a_0$  (Å), layer thickness  $\Delta_d$  (Å), the energy difference  $\Delta_{K-K}$ ,  $\Delta_{K-\Gamma}$  (denoted in Figure 2 in the main text) without or with spin-orbit coupling (SOC) and spin splitting  $\Delta_{K-SOC}$  (meV) of the top valence band at K-point.

| MXY               | (SOC)   | $a_0$ (Å) | $\Delta_d$ (Å) | $\Delta_{K-SOC}$ (meV) | $\Delta_{K-K}$ (eV) | $\Delta_{K-\Gamma}$ (meV) |
|-------------------|---------|-----------|----------------|------------------------|---------------------|---------------------------|
| MoS <sub>2</sub>  | w/o-soc | 3.18      | 3.13           | -                      | 1.68                | 29.7                      |
|                   | w/-soc  |           |                | 149.0                  | 1.60                | 100.8                     |
| MoSe <sub>2</sub> | w/o-soc | 3.32      | 3.34           | -                      | 1.43                | 261.7                     |
|                   | w/-soc  |           |                | 185.7                  | 1.33                | 341.6                     |
| WS <sub>2</sub>   | w/o-soc | 3.182     | 3.14           | -                      | 1.81                | 62.4                      |
|                   | w/-soc  |           |                | 429.8                  | 1.55                | 257.2                     |
| MoSSe             | w/o-soc | 3.25      | 3.23           | -                      | 1.56                | 13.9                      |
|                   | w/-soc  |           |                | 169.5                  | 1.46                | 88.8                      |

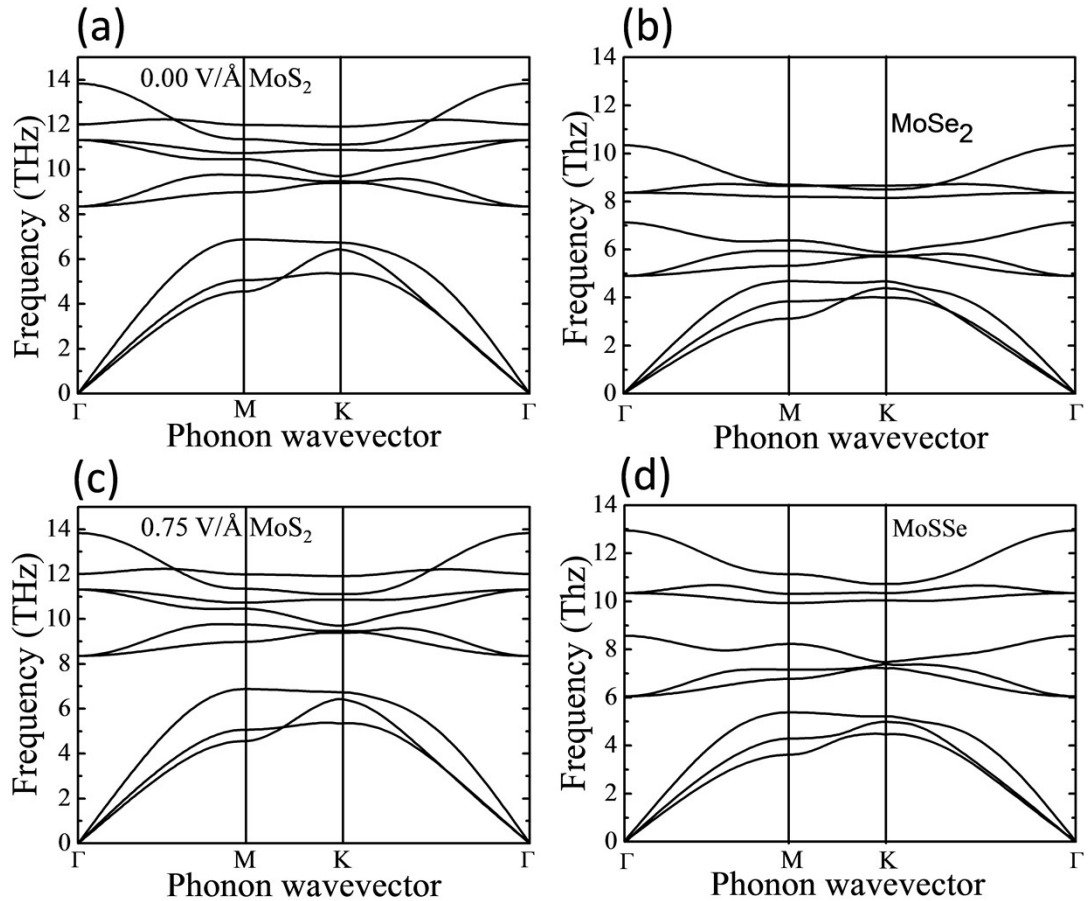

**Figure S1** (a), (c) Phonon dispersion of MoS<sub>2</sub> without and with the external electric field. For comparison, the MoSSe and MoSe<sub>2</sub> are also shown (b), (d). The absence of imaginary frequency indicates the stability of monolayer TMDs.

Extensive experimental and theoretical studies have been reported on the electronic

structure of few-layer TMDs. The interlayer interaction leads to remarkable modifications of the electronic and optical properties of  $\text{MX}_2$ . A transition from indirect (bulk or few-layer) to direct band gap (monolayer) is found.<sup>4-6</sup> Moreover, the valence band maximum (VBM) and conduction band minimum (CBM) are located at the K-point for the monolayer, while the bulk phase has the VBM at the K point and the CBM along the  $\Gamma$ -K line. According to Table S1, the monolayers  $\text{MoS}_2$ ,  $\text{MoSe}_2$ ,  $\text{WS}_2$  as well as  $\text{MoSSe}$  are direct band gap semiconductor independent on including the spin-orbital coupling (SOC). From the Table S1, the band gaps with the SOC are smaller than these without SOC case. The spin splitting of the uppermost valence band at K point  $\Delta_{\text{K-SOC}}$  (meV) are 149.0, 169.5, 185.7, and 429.8 in  $\text{MoS}_2$ ,  $\text{MoSSe}$ ,  $\text{MoSe}_2$  and  $\text{WS}_2$  respectively.

## 2. The planar averaged electrostatic potential and dipole moment

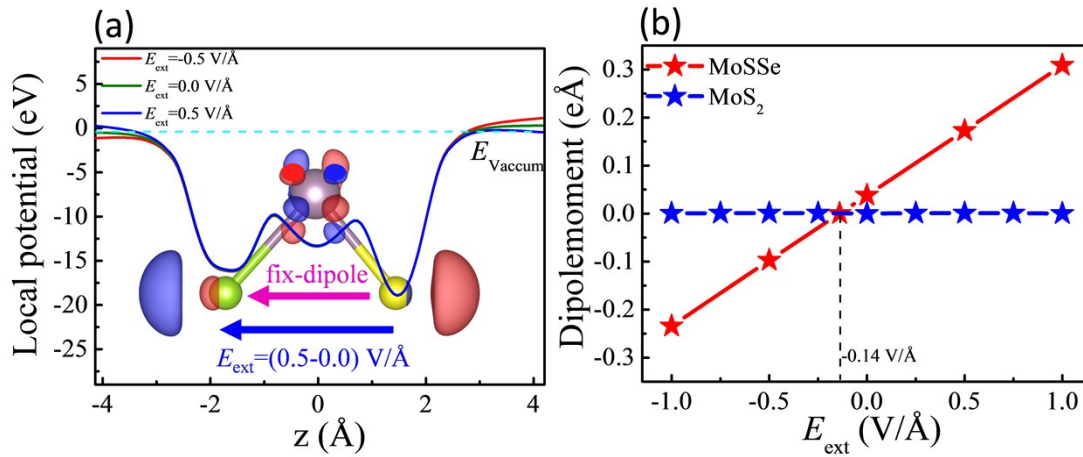

**Figure S2** (a) The planar averaged local potential of  $\text{MoSSe}$  with the external electric field of  $-0.5 \text{ V/\AA}$  (red),  $0.0 \text{ V/\AA}$  (olive), and  $0.5 \text{ V/\AA}$  (blue). The potential data are shifted with respect to the vacuum level (zero energy). The intrinsic dipole from S to Se (it is due to the lower potential to higher potential). The inset is the charge density difference between  $E_{\text{ext}} = 0.5 \text{ V/\AA}$  and  $E_{\text{ext}} = 0 \text{ V/\AA}$ . Red (blue) color represents the electron accumulation (depletion) region. The isosurface value is set to  $0.0038 \text{ e/\AA}^3$ . (b) The dipole moment vary with the extra electric field  $E_{\text{ext}}$ .

The Rashba effect has been reported in the polar-system  $\text{MoSSe}$ .<sup>2</sup> No Rashba splitting has been reported in non-polar system  $\text{MX}_2$  due to the mirror symmetry  $(x, y, z) \rightarrow (x, y, -z)$

vanishing the potential gradients. The mirror symmetry can be broken by the perpendicular extra electric field  $E_{\text{ext}}$ . However the emergence of Rashba effect of  $\text{MX}_2$  and MoSSe originates from the potential gradient around the sulfur atoms under the electric field as described in the main text. In order to distinguish the intrinsic difference of the polar MoSSe and non-polar  $\text{MoS}_2$ , Figure S2 shows the variation of dipole moment with the extra electric field  $E_{\text{ext}}$ . It can be clearly seen that the dipole moment of non-polar  $\text{MoS}_2$  systems remain almost unchanged, and the polar MoSSe vary linearly with extra electric field  $E_{\text{ext}}$ . And it needed the external negative electric field of  $E_{\text{ext}} = -0.14 \text{ V/\AA}$  to accommodate the intrinsic dipole moment.

### 3. The compare Rashba splitting for monolayer MoSe<sub>2</sub> and MoS<sub>2</sub>

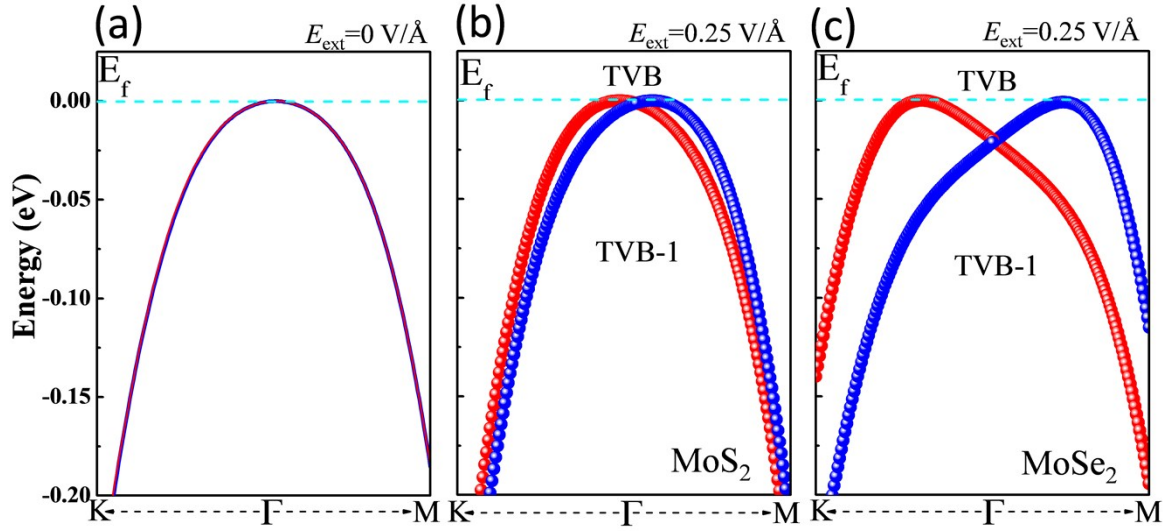

**Figure S3** (a) The enlarged view of TVB of band structure for monolayer MoSe<sub>2</sub> or MoS<sub>2</sub> around the  $\Gamma$  point without the external electric field. (Spin up and down are degeneration) (b), (c) The enlarged view of TVB of band structure for monolayer MoSe<sub>2</sub> or MoS<sub>2</sub> around the  $\Gamma$  point with the electric field  $E_{\text{ext}} = 0.25 \text{ V/\AA}$ . The dot size along the  $\Gamma$ -K and  $\Gamma$ -M direction denotes the expected value of spin operator  $\langle S_{\alpha}(\vec{k}) \rangle$  ( $\alpha = x, y$ ). The red and blue color represents the spin up and down band, respectively. The VBM is set to zero.

Figure S3a show the Rashba splitting for monolayer MoSe<sub>2</sub> or MoS<sub>2</sub> at  $\Gamma$  point without the external field. The topmost valence bands are set to zero. (The red and blue) represent the spin up and spin down). The spin up and spin down are degeneration. From Figure S3b-c we can clear see that the external electric field  $E_{\text{ext}} = 0.25 \text{ V/\AA}$  (it is easy to be reach by the experimental level in ionic liquid gate) can induce a larger isotropic spin splitting in MoSe<sub>2</sub>. (See details in main text)

#### 4. The Rashba splitting and spin texture for MoSe<sub>2</sub>

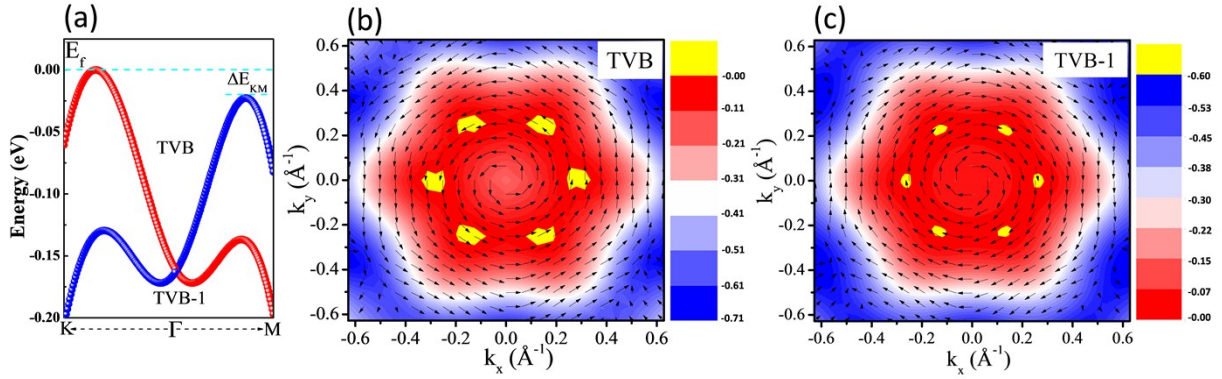

**Figure S4** (a) The enlarged view of TVB of band structure for MoSe<sub>2</sub> around the  $\Gamma$  point with the increase field  $E_{\text{ext}} = 0.70 \text{ V/\AA}$ . The dot size along the  $\Gamma$ -K and  $\Gamma$ -M direction denotes the expected value of spin operator  $\langle S_{\alpha}(\vec{k}) \rangle$  ( $\alpha = x, y$ ). The red and blue color represents the spin up and down band, respectively. The VBM is set to zero. (b), (c) The energy contour and spin texture of the top valence band TVB and the neighboring band below TVB-1 around the  $\Gamma$  point with electric field  $E_{\text{ext}} = 0.70 \text{ V/\AA}$ .

Figure 4a show the Rashba splitting for MoSe<sub>2</sub> at  $\Gamma$  point with the external field  $E_{\text{ext}} = 0.70 \text{ V/\AA}$ . The topmost valence bands are set to zero. (The red and blue) represent the spin up and spin down). Figure S4 b and c show the energy contour and spin texture of the top valence band (TVB) and its neighboring band (TVB-1) around the  $\Gamma$  point. (See details in main text)

## 5. The Rashba splitting of MoSSe

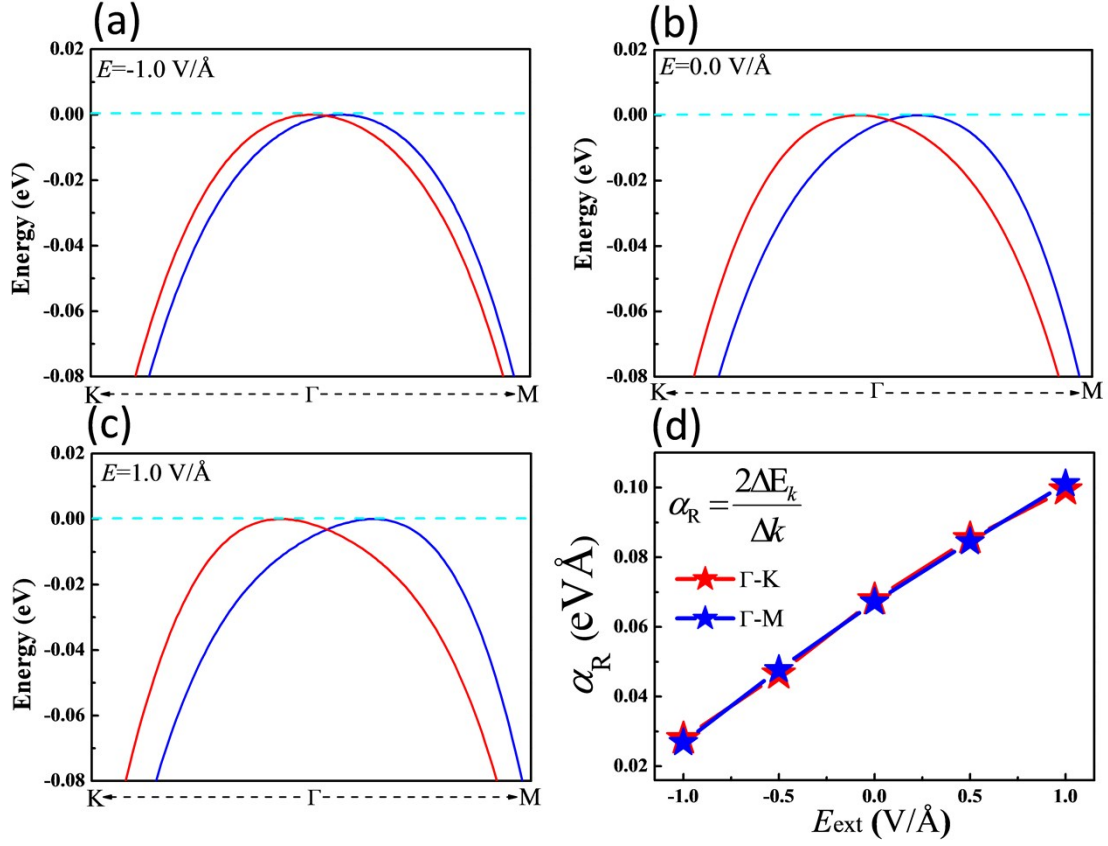

**Figure S5** (a)-(c) The Rashba splittings for MoSSe with field  $E_{\text{ext}} = -1.0 \text{ V/Å}$ ,  $E_{\text{ext}} = 0.0 \text{ V/Å}$ , and  $E_{\text{ext}} = 1.0 \text{ V/Å}$ . The topmost valence bands are set to zero. The spin up and spin down electrons are represented by the red and blue lines. (d) The Rashba splitting is linear with the extra electric field with formula  $\alpha_R = \frac{2\Delta E}{\Delta k}$ . Blue star and red star represent  $\alpha_R$  along the  $\Gamma$ M and  $\Gamma$ K directions, respectively.

Figure S5a-c show the Rashba splitting for MoSSe with field  $E_{\text{ext}} = -1.0 \text{ V/Å}$ ,  $0.0 \text{ V/Å}$ , and  $1.0 \text{ V/Å}$ . The topmost valence bands are set to zero. (The red and blue) represent the spin up and spin down). From Figure S5 we can see that  $\alpha_R^{\text{iso}}$  of MoSSe has linear dependence on the electric field. Negative (positive) electric field increases (decreases) the  $\alpha_R^{\text{iso}}$  of MoSSe.

## 6. The nonlinear Rashba splitting of MoSe<sub>2</sub>

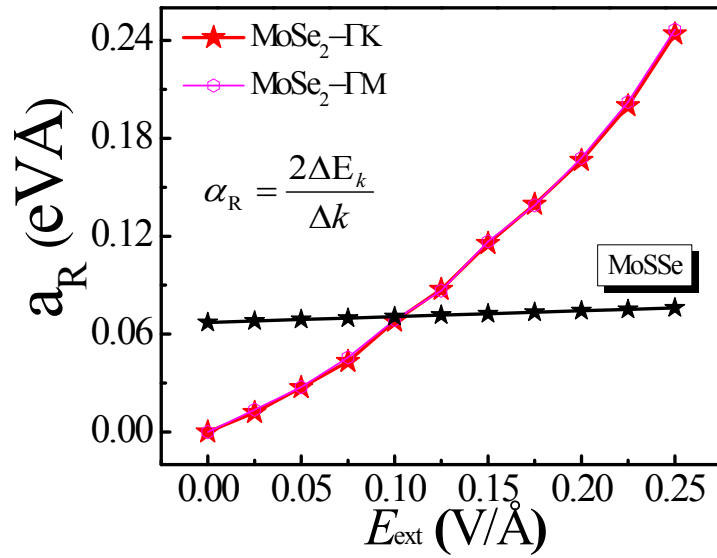

**Figure S6** The linear Rashba parameters calculated by  $\alpha_R = \frac{2\Delta E}{\Delta k}$  along  $\Gamma$ -K (filled symbols) and  $\Gamma$ -M (empty symbols) direction. For comparison, the data for MoSSe are also shown (black stars).

Figure S6 shows the zoom in plot as that in Fig. 4a. It is clearly seen that Rashba spin splitting of MoSe<sub>2</sub> deviates from the linear behavior in the experimentally accessible conditions ( $E_{\text{ext}} = 0.27 \text{ V/\AA}$ ).



## 7. The Rashba splitting of MoSe<sub>2</sub> and WSe<sub>2</sub>

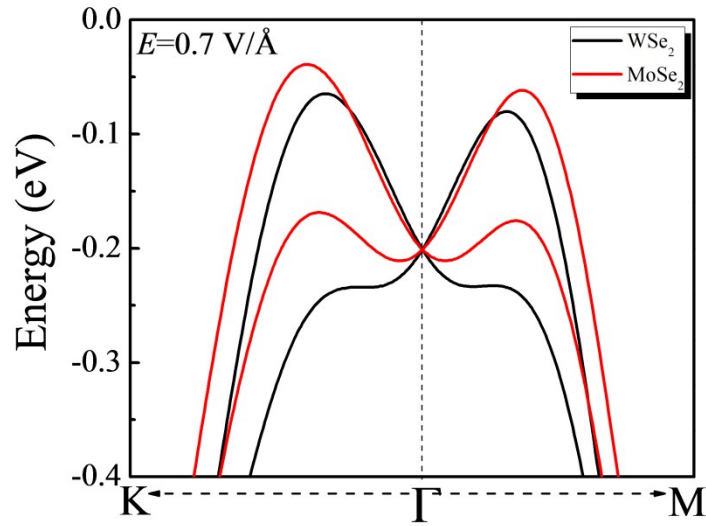

**Figure S7** The enlarged view of TVB of band structure for MoSe<sub>2</sub> and WSe<sub>2</sub> under the field  $E_{\text{ext}} = 0.70 \text{ V/\AA}$

Figure S7 show the Rashba splitting for MoSe<sub>2</sub> (red) and WSe<sub>2</sub> (black) with field  $E_{\text{ext}} = 0.70 \text{ V/\AA}$ . From Figure S5 we clearly see that the anisotropic energy splitting  $\Delta_{\text{K-M}}$  of MoSe<sub>2</sub> (22.7 meV) is slightly larger than WSe<sub>2</sub> (15.7 meV).

## References:

1. Z. Y. Zhu, Y. C. Cheng and U. Schwingenschlögl, *Phys. Rev. B* 2011, **84**, 153402.
2. Y. C. Cheng, Z. Y. Zhu, M. Tahir and U. Schwingenschlögl, *EPL* (Europhysics Letters) 2013, **102**, 57001.
3. H. L. Zhuang and R. G. Hennig, *J. Phys. Chem. C* 2013, **117**, 20440-20445.
4. A. Splendiani, L. Sun, Y. Zhang, T. Li, J. Kim, C. Y. Chim, G. Galli and F. Wang, *Nano Lett.* 2010, **10**, 1271-1275.
5. S. Tongay, J. Zhou, C. Ataca, K. Lo, T. S. Matthews, J. Li, J. C. Grossman and J. Wu, *Nano Lett.* 2012, **12**, 5576-5580.
6. Y. Zhang, T. R. Chang, B. Zhou, Y. T. Cui, H. Yan, Z. Liu, F. Schmitt, J. Lee, R. Moore, Y. Chen, H. Lin, H. T. Jeng, S. K. Mo, Z. Hussain, A. Bansil and Z. X. Shen, *Nat. Nanotechnol.* 2014, **9**, 111-115.
